# Supplementary material for: Microbial Ecology of European Foul Brood Disease in the Honey Bee (Apis mellifera): Towards a Microbiome Understanding of Disease Susceptibility
Source: Insects. 2020 Aug 20;11(9):555. doi: 10.3390/insects11090555 (PMC7565670; doi:10.3390/insects11090555)
Supplement: Supplementary file 1 [file insects-11-00555-s001.xlsx]

## Sheet: Table S1 Microbiome raw reads
Microbial ecology of European foul brood disease in the honey bee (Apis mellifera): Towards a microbiome understanding of disease susceptibility.
By Amy S. Floyd, Brendon M. Mott, Patrick Maes, Duan C. Copeland, Quinn S. McFrederick, and Kirk E. Anderson
Table S1. Microbiome raw read count (relative abundance) by niche and taxonomy
			TAXONOMY
			Bacteria(100);Firmicutes(100);Bacilli(100);Lactobacillales(100);Lactobacillaceae(100);Lactobacillus(99);unclassified(92);	Bacteria(100);Proteobacteria(100);Alphaproteobacteria(100);Rhodospirillales(100);Acetobacteraceae(100);Saccharibacter(71);Alpha2.2(71);	Bacteria(100);Firmicutes(100);Bacilli(100);Lactobacillales(100);Leuconostocaceae(100);Fructobacillus(100);unclassified(100);	Bacteria(100);Bacteria_unclassified(100);Bacteria_unclassified(100);Bacteria_unclassified(100);Bacteria_unclassified(100);Bacteria_unclassified(100);Bacteria_unclassified(100);	Bacteria(100);Proteobacteria(100);Gammaproteobacteria(100);Gammaproteobacteria_order_incertae_sedis(100);Gammaproteobacteria_family_incertae_sedis(100);Gamma-1Gilliamella(100);Gamma-1Gilliamella_unclassified(100);	Bacteria(100);Proteobacteria(100);Gammaproteobacteria(100);Xanthomonadales(100);Xanthomonadaceae(100);Rhodanobacter(100);Rhodanobacter_lindaniclasticus(100);	Bacteria(100);Actinobacteria(100);Actinobacteria(100);Actinomycetales(100);Actinomycetales_unclassified(100);Actinomycetales_unclassified(100);Actinomycetales_unclassified(100);	Bacteria(100);Firmicutes(100);Bacilli(100);Lactobacillales(100);Enterococcaceae(100);Melissococcus(100);Melissococcus_plutonius(100);	Bacteria(100);Firmicutes(100);Bacilli(100);Lactobacillales(100);Lactobacillaceae(100);Lactobacillus(100);Firm5(100);	Bacteria(100);Actinobacteria(100);Actinobacteria(100);Actinomycetales(100);Corynebacteriaceae(100);Corynebacterium(100);unclassified(100);	Bacteria(100);Firmicutes(100);Bacilli(100);Lactobacillales(100);Lactobacillaceae(100);Lactobacillus(100);Firm5(100);	Bacteria(100);Firmicutes(100);Bacilli(100);Lactobacillales(100);Lactobacillaceae(100);Lactobacillus(100);Firm5(100);	Bacteria(100);Proteobacteria(100);Gammaproteobacteria(100);Pseudomonadales(100);Pseudomonadaceae(100);Pseudomonas(100);Pseudomonas_unclassified(100);	Bacteria(100);Proteobacteria(100);Betaproteobacteria(100);Burkholderiales(100);Burkholderiaceae(100);Ralstonia(100);unclassified(100);	Bacteria(100);Proteobacteria(100);Gammaproteobacteria(100);Xanthomonadales(100);Xanthomonadaceae(100);Rhodanobacter(100);unclassified(100);	Bacteria(100);Proteobacteria(100);Betaproteobacteria(100);Neisseriales(100);Neisseriaceae(100);BetaSnodgrassella(99);BetaSnodgrassella_unclassified(99);	Bacteria(100);Actinobacteria(100);Actinobacteria(100);Actinomycetales(100);Propionibacteriaceae(100);Propionibacterium(100);Propionibacterium_acnes(100);	Bacteria(100);Proteobacteria(100);Gammaproteobacteria(100);Gammaproteobacteria_order_incertae_sedis(100);Gammaproteobacteria_family_incertae_sedis(100);Gamma-1(79);Gamma-1_unclassified(79);	Bacteria(100);Proteobacteria(100);Alphaproteobacteria(100);Rhizobiales(100);Alpha1(78);Alpha1_unclassified(78);Alpha1_unclassified(78);	Bacteria(100);Bacteroidetes(100);Flavobacteria(100);Flavobacteriales(100);Flavobacteriaceae(100);Cloacibacterium(100);Cloacibacterium_unclassified(100);	Bacteria(100);Firmicutes(100);Bacilli(100);Lactobacillales(100);Lactobacillaceae(100);Lactobacillus(100);Firm5(100);	Bacteria(100);Firmicutes(100);Bacilli(100);Lactobacillales(100);Lactobacillaceae(100);Lactobacillus(100);Firm5(100);	Bacteria(100);Actinobacteria(100);Actinobacteria(100);Bifidobacteriales(100);Bifidobacteriaceae(100);Bifidobacteriaceae_unclassified(66);Bifidobacteriaceae_unclassified(66);	Bacteria(100);Proteobacteria(100);Betaproteobacteria(100);Burkholderiales(100);Burkholderiaceae(100);Burkholderia(100);Burkholderia_gladioli(98);	Bacteria(100);Bacteria_unclassified(100);Bacteria_unclassified(100);Bacteria_unclassified(100);Bacteria_unclassified(100);Bacteria_unclassified(100);Bacteria_unclassified(100);	Bacteria(100);Firmicutes(100);Bacilli(100);Bacillales(100);Bacillales_Incertae_Sedis_XII(100);Exiguobacterium(100);Exiguobacterium_unclassified(100);	Bacteria(100);Bacteroidetes(100);Flavobacteria(100);Flavobacteriales(100);Flavobacteriaceae(100);Flavobacteriaceae_unclassified(100);Flavobacteriaceae_unclassified(100);	Bacteria(100);Actinobacteria(100);Actinobacteria(100);Actinomycetales(100);Geodermatophilaceae(100);unclassified(93);unclassified(93);	Bacteria(100);Proteobacteria(100);Gammaproteobacteria(100);Gammaproteobacteria_order_incertae_sedis(100);Gammaproteobacteria_family_incertae_sedis(100);Gamma2(100);Gamma2_unclassified(100);	Bacteria(100);Actinobacteria(100);Actinobacteria(100);Actinomycetales(100);Microbacteriaceae(100);unclassified(98);unclassified(98);	Bacteria(100);Actinobacteria(100);Actinobacteria(100);Actinomycetales(100);Microbacteriaceae(100);Microbacterium(100);Microbacterium_unclassified(100);	Bacteria(100);Proteobacteria(100);Gammaproteobacteria(100);Enterobacteriales(100);Enterobacteriaceae(100);unclassified(99);unclassified(99);	Bacteria(100);Firmicutes(100);Bacilli(100);Lactobacillales(100);Lactobacillaceae(100);Lactobacillus(100);Firm5(100);	Bacteria(100);Actinobacteria(100);Actinobacteria(100);Actinomycetales(100);Micrococcaceae(100);Kocuria(100);Kocuria_unclassified(100);	Bacteria(100);Proteobacteria(100);Gammaproteobacteria(100);Gammaproteobacteria_order_incertae_sedis(100);Gammaproteobacteria_family_incertae_sedis(100);Gamma-1Gilliamella(82);Gamma-1Gilliamella_unclassified(82);	Bacteria(100);Firmicutes(100);Bacilli(100);Lactobacillales(100);Lactobacillaceae(100);Lactobacillus(100);Firm4(100);	Bacteria(100);Proteobacteria(100);Gammaproteobacteria(100);Pseudomonadales(100);Moraxellaceae(100);Acinetobacter(100);unclassified(92);	Bacteria(100);Proteobacteria(100);Alphaproteobacteria(100);Rhizobiales(100);Alpha1(98);Alpha1_unclassified(98);Alpha1_unclassified(98);	Bacteria(100);Proteobacteria(100);Alphaproteobacteria(100);Rhizobiales(100);Bradyrhizobiaceae(100);Bradyrhizobiaceae_unclassified(97);Bradyrhizobiaceae_unclassified(97);	Bacteria(100);Actinobacteria(100);Actinobacteria(100);Bifidobacteriales(100);Bifidobacteriaceae(100);Bifidobacterium(100);BeeBifido(100);	Bacteria(100);Proteobacteria(100);Gammaproteobacteria(100);Pseudomonadales(100);Pseudomonadaceae(100);Pseudomonas(100);Pseudomonas_unclassified(91);	Bacteria(100);Firmicutes(100);Clostridia(100);Clostridiales(100);Clostridiales_unclassified(100);Clostridiales_unclassified(100);Clostridiales_unclassified(100);	Bacteria(100);Firmicutes(100);Bacilli(100);Lactobacillales(100);Lactobacillaceae(100);Lactobacillus(100);Firm4(100);	Bacteria(100);Bacteroidetes(100);Flavobacteria(100);Flavobacteriales(100);Flavobacteriaceae(100);Flavobacteriaceae_unclassified(100);Flavobacteriaceae_unclassified(100);	Bacteria(100);Proteobacteria(100);Gammaproteobacteria(100);Enterobacteriales(100);Enterobacteriaceae(100);Enterobacteriaceae_unclassified(88);Enterobacteriaceae_unclassified(88);	Bacteria(100);Firmicutes(100);Bacilli(100);Lactobacillales(100);Streptococcaceae(100);Streptococcus(100);Streptococcus_pseudopneumoniae(75);	Bacteria(100);Proteobacteria(100);Gammaproteobacteria(100);Enterobacteriales(100);Enterobacteriaceae(100);Enterobacteriaceae_unclassified(80);Enterobacteriaceae_unclassified(80);
NICHE	Library	read #	Lactobacillus kunkeei	Parasaccharibacter apium	Fructobacillus fructosus	Chloroplast	Gilliamella apicola	Xanthomonadales (1)	Actinomycetales (1)	Melissococcus plutonius	Lactobacillus Firm5	Corynebacterium	Lactobacillus Firm5	Lactobacillus Firm5	Pseudomonadales	Ralstonia	Xanthomonadales (2)	Snodgrassella alvi	Actinomycetales (1)	Gilliamella apicola (2)	Bartonella apis	Flavobacteriales
			Otu0001	Otu0002	Otu0003	Otu0004	Otu0005	Otu0006	Otu0007	Otu0008	Otu0009	Otu0010	Otu0011	Otu0012	Otu0013	Otu0014	Otu0015	Otu0016	Otu0017	Otu0018	Otu0019	Otu0020	Otu0021	Otu0022	Otu0023	Otu0024	Otu0025	Otu0026	Otu0027	Otu0028	Otu0029	Otu0030	Otu0031	Otu0032	Otu0033	Otu0034	Otu0035	Otu0036	Otu0037	Otu0038	Otu0039	Otu0040	Otu0041	Otu0042	Otu0043	Otu0044	Otu0045	Otu0046	Otu0047
Beebread
	C1510S3.16S	32243	1209	192	82	3267	61	132	517	23	334	19	298	14354	203	61	14	228	275	125	14	22	68	332	59	12	14	5333	2	3	18	34	8	34	111	3	1	5	44	8	175	28	854	0	4	1	0	1	22
	C1513Y7.16S	21089	1583	268	57	15922	47	75	114	19	35	37	21	13	50	30	26	9	47	7	9	7	0	74	14	19	43	7	4	13	5	7	7	0	7	0	1	3	3	1	59	4	1	0	4	1	3	0	1
	C1514Y8.16S	12035	1729	141	59	2260	36	139	158	20	25	34	39	17	65	44	46	4	53	2	9	2	36	37	67	38	11	13	4	48	0	11	15	0	37	5	1	4	5	0	32	9	10	3	3	1	10	0	1
	C153T3.16S	4788	655	569	32	634	63	83	596	13	43	34	20	8	93	32	37	68	51	41	31	0	6	3	16	8	45	4	0	5	9	10	8	3	7	5	1	0	13	4	101	5	361	0	0	0	5	0	1
	C157Y4.16S	29484	1261	219	52	24335	38	92	93	11	35	20	8	31	73	60	40	11	18	2	14	4	6	202	13	5	25	5	1	16	3	6	14	0	2	5	3	2	2	4	67	10	1	3	2	0	0	2	2
	C210S3.16S	17233	1866	344	127	3133	84	77	2747	286	16	68	19	10	50	62	16	21	50	10	5	6	1	43	33	12	5698	6	2	4	0	11	29	22	16	8	2	2	23	6	107	5	17	0	2	2	4	3	5
	C213Y7.16S	39955	10496	234	43	24347	74	111	702	394	9	45	6	12	89	62	33	5	71	8	7	6	4	9	15	7	25	8	0	35	0	8	19	5	1	7	1	0	0	4	47	8	7	0	0	0	1	22	0
	C214Y8.16S	12598	1427	262	84	732	57	240	421	431	8	1430	26	6	55	151	60	4	107	4	10	862	0	16	38	11	30	25	279	20	1	462	535	6	30	6	4	0	4	7	110	7	5	0	1	81	7	0	0
	C23T3.16S	125525	40859	16841	7421	7876	4349	2658	2430	1721	3000	1449	1578	1094	1062	704	1014	936	924	1055	875	775	795	711	372	437	594	382	445	391	429	281	300	271	335	273	250	1251	188	310	280	190	268	125	152	133	152	125	77
	C27Y4.16S	19755	4515	178	69	10092	58	90	598	149	13	31	19	30	68	64	30	10	56	5	7	5	7	20	73	6	23	33	0	43	5	12	22	3	19	6	3	0	6	3	67	5	0	3	0	0	13	3	1
Mouthparts
	MP1	199988	665	1280	1861	375	23326	20989	1548	69	25669	131	13626	582	4787	449	9013	9466	1838	8482	8116	347	7202	4855	5326	4021	23	43	14	38	3853	76	474	71	2096	27	1492	1832	68	2771	974	2556	60	0	1725	13	1263	1204	32
	MP2	90176	326	18755	46762	595	334	5846	1604	30	17	194	5	14	1602	119	1217	50	3257	24	28	6	4	7	142	316	31	10	4	58	9	69	19	16	0	19	17	1	14	5	229	11	28	3	4	1	173	154	9
	MP3	53728	325	21113	13908	53	54	2228	46	19	70	124	423	15	681	272	897	110	779	99	12	2	7	294	221	47	0	3	56	4423	4	6	15	0	3	3639	2	2	10	4	53	61	4	1	2	0	2	1	0
	MP4	94605	31504	33617	77	96	65	1136	22315	31	23	139	275	37	535	41	438	18	928	9	8	123	129	541	191	135	6	6	40	14	2	17	74	4	290	23	1	83	383	7	34	3	1	0	6	1	0	6	5
	MP5	63976	32413	25559	363	62	20	1165	30	14	10	22	2	8	286	246	215	9	1561	1	9	4	3	1	1	199	0	3	44	4	0	63	26	9	0	0	0	0	3	0	20	0	3	0	1	0	2	0	2
Larvae (2nd instar)
	P1.LARVAE	113353	67778	238	504	185	1288	1103	59	19235	1956	746	612	124	1145	3576	460	340	244	147	22	304	15	533	47	630	7	13	7	123	146	518	109	9	920	9	61	4	8	7	202	7	10	178	0	6	107	155	334
	P10.LARVAE	40594	30198	52	437	51	1028	830	12	9	0	14	138	3	1272	3382	227	3	208	5	3	118	1	4	0	52	1	3	0	2	0	0	0	40	0	3	29	0	96	0	0	0	87	9	0	0	72	1	0
	P9.LARVAE	53398	22522	24033	34	25	3211	97	30	70	11	198	19	82	178	542	5	4	15	342	9	0	16	12	5	37	0	1	0	5	292	24	7	4	39	0	150	0	4	0	0	2	55	36	1	0	1	1	4
	P11.LARVAE	64453	5240	53590	777	54	152	192	24	60	7	25	41	4	92	292	105	32	49	39	10	1	41	5	12	26	3	6	20	9	7	9	31	2	17	3	12	0	8	5	6	0	27	1701	0	15	15	2	5
	P2.LARVAE	58758	37257	6049	3982	19	818	708	14	888	8	12	232	6	681	2871	431	13	62	82	8	0	1	0	1	11	1	0	0	8	0	8	0	114	1	0	30	0	0	2	49	0	3	2	0	0	0	105	1
Honey (tops of ripening cells)
	P4.HONEY	137921	125688	718	1123	64	4161	190	66	1315	22	38	15	33	259	107	68	11	416	75	10	22	5	29	17	12	11	11	0	11	26	10	22	975	3	8	210	0	289	0	151	4	18	0	0	3	1	7	186
	P5.HONEY	245679	196014	7376	15330	128	13650	101	140	166	45	2213	38	91	236	59	37	44	46	223	27	621	12	525	14	27	8	14	61	23	62	717	408	2225	32	10	779	0	1142	19	4	14	14	3	6	22	5	13	734
	P6.HONEY	15418	10328	111	1385	1	237	269	0	2	5	68	1	0	995	261	89	0	209	0	0	4	0	2	0	5	1	0	0	0	0	0	0	0	0	2	9	0	2	1	5	0	3	0	0	0	0	1	0
	P9.HONEY	56988	45145	533	147	26	2826	37	10	8	723	13	5	11	510	654	7	1328	233	47	4	0	0	6	0	123	0	1	2	1	74	30	5	124	117	1	141	0	456	1	117	106	4	3	1	0	1	34	157
	P11.HONEY	174004	68912	32851	8567	70	6773	541	484	8368	28	13058	32	43	1246	1211	203	279	473	132	4	5823	7	9	118	432	6	22	4490	42	49	2355	2337	269	7	20	443	3	406	0	260	18	321	4	4	1617	38	13	191
[truncated: 2,238 more columns]

## Sheet: Table S2 Alpha Diverstiy
Microbial ecology of European foul brood disease in the honey bee (Apis mellifera): Towards a microbiome understanding of disease susceptibility.
By Amy S. Floyd, Brendon M. Mott, Patrick Maes, Duan C. Copeland, Quinn S. McFrederick, and Kirk E. Anderson
Table S2. Alpha diversity of microbiome samples by niche
Beebread
	Library	nseqs	Goods Coverage	number of observed OTUs	invsimpson	invsimpson 95% CI
	C1510S3.16S	32243	0.997333	305	4.18514	4.11344	4.25938
	C1513Y7.16S	21089	0.995969	351	1.7356	1.71054	1.7614
	C1514Y8.16S	12035	0.994848	544	16.9967	16.2281	17.8417
	C153T3.16S	4788	0.983918	269	13.4677	12.8958	14.0927
	C157Y4.16S	29484	0.997626	353	1.46337	1.4485	1.47854
	C210S3.16S	17233	0.994371	303	5.50253	5.39634	5.61297
	C213Y7.16S	39955	0.997823	369	2.26845	2.24621	2.29114
	C214Y8.16S	12598	0.993253	408	23.6428	22.8294	24.5163
	C23T3.16S	125525	0.998693	1382	7.38176	7.29981	7.46558
	C27Y4.16S	19755	0.99595	403	3.1753	3.11635	3.23652
Mouthparts
	MP1	199988	0.999095	593	16.9991	16.8824	17.1174
	MP2	90176	0.998237	384	3.13528	3.10783	3.16322
	MP3	53728	0.998269	211	4.24589	4.19989	4.2929
	MP4	94605	0.998858	241	3.41095	3.39704	3.42498
	MP5	63976	0.998656	169	2.39598	2.38364	2.40844
Larvae
	P1.LARVAE	113353	0.999065	341	2.57468	2.55483	2.59484
	P10.LARVAE	40594	0.998793	111	1.77687	1.75817	1.79596
	P11.LARVAE	64453	0.998852	190	1.43081	1.4216	1.44014
	P2.LARVAE	58758	0.998911	156	2.3771	2.35175	2.40302
	P9.LARVAE	53398	0.998989	147	2.60209	2.58655	2.61782
Honey
	P4.HONEY	137921	0.99926	233	1.20242	1.19856	1.20631
	P5.HONEY	245679	0.999487	383	1.55118	1.54544	1.55697
	P6.HONEY	15418	0.998443	62	2.15848	2.11617	2.20251
	P9.HONEY	56988	0.999088	133	1.5837	1.57094	1.59667
	P11.HONEY	174004	0.999126	445	4.83491	4.79937	4.87098

## Sheet: Table S3 Culturing and Blastn 
Microbial ecology of European foul brood disease in the honey bee (Apis mellifera): Towards a microbiome understanding of disease susceptibility.
By Amy S. Floyd, Brendon M. Mott, Patrick Maes, Duan C. Copeland, Quinn S. McFrederick, and Kirk E. Anderson
Table S3. Results culturing diseased larvae from various locales experiencing EFB outbreaks.
Resulting isolates sequenced for 16S rRNA gene, then classified by BLASTn (2019).
Isolate ID	Colony Morphology	Top Blastn result	Max score	Total score	Query cover	E Value	Identity	Accession #	Media used	Date Isolated	Larval instar	Condition	State collected
3462 A	A	Paenibacillus alvei strain m420 16S ribosomal RNA gene, partial sequence	1543	1543	0.98	0	0.99	MF187642.1	M1	2018-05-03			WA
3716 A	A	Paenibacillus alvei strain Oa17A 16S ribosomal RNA gene, partial sequence	1511	1511	0.99	0	0.99	MG461561.1	M1	2018-05-03			VT
7038 A1	A	Paenibacillus alvei strain Oa17A 16S ribosomal RNA gene, partial sequence	1531	1531	0.99	0	0.99	MG461561.1	M1	2018-05-08			AL
7038 A2	A	Paenibacillus alvei strain Oa17A 16S ribosomal RNA gene, partial sequence	1535	1535	0.98	0	0.99	MG461561.1	KSBHI	2018-05-08			AL
7060 A	A	Paenibacillus alvei strain Sp33 16S ribosomal RNA gene, partial sequence	1273	1273	0.81	0	0.99	MG650050.1	KSBHI	2018-05-08			MA
7061 A	A	Paenibacillus alvei strain Oa17A 16S ribosomal RNA gene, partial sequence	1537	1537	0.99	0	0.99	MG461561.1	KSBHI	2018-05-08			MA
3670 B1	B	Lactobacillus sp. DAT705 gene for 16S ribosomal RNA, partial sequence	1530	1530	0.98	0	0.99	AB777202.1	M1	2018-05-03			MI
3670 B2	B	Melissococcus plutonius DAT561 DNA, complete genome	1543	6166	0.98	0	0.99	AP018492.1	KSBHI	2018-05-03			MI
3751 B	B	Melissococcus plutonius DAT561 DNA, complete genome	1541	6159	0.98	0	0.99	AP018492.1	KSBHI	2018-05-03			IL
3777 B	B	Paenibacillus alvei strain Oa17A 16S ribosomal RNA gene, partial sequence	1519	1519	0.99	0	0.99	MG461561.1	M1	2018-05-03			OH
4L3 B	B	Lactobacillus kunkeei strain G5_7_3MO2 16S ribosomal RNA gene, partial sequence	1533	1533	0.98	0	0.99	KF600275.1	M1	2018-04-12			AZ
7038 B	B	Paenibacillus alvei strain Oa17A 16S ribosomal RNA gene, partial sequence	1533	1533	0.99	0	0.99	MG461561.1	M1	2018-05-08			AL
7054 B1	B	Melissococcus plutonius DAT561 DNA, complete genome	1537	6150	0.99	0	0.99	AP018492.1	M1	2018-05-08			SC
7054 B2	B	Melissococcus plutonius DAT561 DNA, complete genome	1535	6142	0.99	0	0.99	AP018492.1	KSBHI	2018-05-08			SC
7054 B3	B	Melissococcus plutonius DAT561 DNA, complete genome	1509	6039	1	0	0.99	AP018492.1	KSBHI	2018-05-08			SC
7060 B	B	Paenibacillus alvei strain Oa17A 16S ribosomal RNA gene, partial sequence	1537	1537	0.99	0	0.99	MG461561.1	KSBHI	2018-05-08			MA
7061 B	B	Paenibacillus alvei strain mv82 16S ribosomal RNA gene, partial sequence	1496	1496	0.97	0	0.99	MF187643.1	KSBHI	2018-05-08			MA
K003 B	B	Melissococcus plutonius DAT561 DNA, complete genome	1541	6159	0.98	0	0.99	AP018492.1	KSBHI	2018-06-06	2		CO
K005 B	B	Melissococcus plutonius DAT561 DNA, complete genome	1541	6159	0.98	0	0.99	AP018492.1	KSBHI	2018-06-06	2	SCALE	CO	Strain Mp5
K006 B	B	Melissococcus plutonius DAT561 DNA, complete genome	1533	6129	0.98	0	0.99	AP018492.1	KSBHI	2018-06-06	2		CO
K007 B	B	Melissococcus plutonius DAT561 DNA, complete genome	1489	5952	0.97	0	0.99	AP018492.1	KSBHI	2018-06-06	3?	MELTED	CO
K013 B	B	Melissococcus plutonius DAT561 DNA, complete genome	1509	6033	0.99	0	0.99	AP018492.1	KSBHI	2018-06-06	PP	UNCAPPED MELTED	CO
K014 B	B	Melissococcus plutonius DAT561 DNA, complete genome	1544	6174	0.98	0	0.99	AP018492.1	KSBHI	2018-06-06	2	MELTED	CO
K015 B	B	Melissococcus plutonius DAT561 DNA, complete genome	1522	6085	0.99	0	0.99	AP018492.1	KSBHI	2018-06-06	2		CO
K016 B	B	Melissococcus plutonius DAT561 DNA, complete genome	1541	6159	0.98	0	0.99	AP018492.1	KSBHI	2018-06-06	2		CO
K017 B	B	Melissococcus plutonius DAT561 DNA, complete genome	1524	6092	0.98	0	0.99	AP018492.1	KSBHI	2018-06-06	3		CO
K018 B	B	Melissococcus plutonius DAT561 DNA, complete genome	1524	6092	0.98	0	0.99	AP018492.1	KSBHI	2018-06-06	3		CO
K020 B	B	*NO SIMILARITY FOUND							KSBHI	2018-06-06	2		CO
K022 B	B	*NO SIMILARITY FOUND							KSBHI	2018-06-06	2		CO
K023 B	B	Melissococcus plutonius DAT561 DNA, complete genome	1472	5886	0.99	0	0.98	AP018492.1	KSBHI	2018-06-06	2		CO
K024 B	B	Melissococcus plutonius DAT561 DNA, complete genome	1535	6137	0.98	0	0.99	AP018492.1	KSBHI	2018-06-06	2		CO
K038 B	B	Bifidobacterium thermophilum strain TEEV 3 16S ribosomal RNA gene, partial sequence	527	527	0.58	2e-145	0.83	GQ913429.1	KSBHI	2018-06-06	3		CO
K049 B	B	Melissococcus plutonius DAT561 DNA, complete genome	1520	6078	1	0	0.99	AP018492.1	KSBHI	2018-06-06	1	HEALTHY	CO
K051 B	B	Melissococcus plutonius DAT561 DNA, complete genome	1535	6137	0.98	0	0.99	AP018492.1	KSBHI	2018-06-06	2		CO
K053 B	B	Melissococcus plutonius DAT561 DNA, complete genome	1400	5597	0.97	0	0.96	AP018492.1	KSBHI	2018-06-06	2	MELTED	CO
K055 B	B	Melissococcus plutonius DAT561 DNA, complete genome	1520	6078	0.99	0	0.99	AP018492.1	KSBHI	2018-06-06	2		CO
K056 B	B	Melissococcus plutonius DAT561 DNA, complete genome	1489	5952	0.98	0	0.99	AP018492.1	KSBHI	2018-06-06	2	SCALE	CO
K062 B	B	Melissococcus plutonius DAT561 DNA, complete genome	1520	6078	0.98	0	0.99	AP018492.1	KSBHI	2018-06-06	1?	MELTED	CO
K069 B	B	Melissococcus plutonius DAT561 DNA, complete genome	1456	5819	0.98	0	0.98	AP018492.1	KSBHI	2018-06-06	2		CO
K071 B	B	Melissococcus plutonius DAT561 DNA, complete genome	1535	6137	0.98	0	0.99	AP018492.1	KSBHI	2018-06-06	2		CO
K100 B	B	*NO SIMILARITY FOUND							KSBHI	2018-06-06	3	SCALE	CO
K104 B	B	*NO SIMILARITY FOUND							KSBHI	2018-06-06	2		CO
K112 B	B	*NO SIMILARITY FOUND							KSBHI	2018-06-06	2	HEALTHY	CO
M006 B3	B	Melissococcus plutonius DAT561 DNA, complete genome	1537	6150	0.98	0	0.99	AP012282.1	M1	2018-06-06	2		CO
M013 B	B	Melissococcus plutonius DAT561 DNA, complete genome	1504	6011	0.98	0	0.99	AP018492.1	M1	2018-06-06	PP		CO
M018 B	B	Melissococcus plutonius DAT561 DNA, complete genome	1539	6151	0.98	0	0.99	AP018492.1	M1	2018-06-06	3		CO
M021 B	B	Lactobacillus kunkeei strain G7_8_4MO2 16S ribosomal RNA gene, partial sequence	1548	1548	0.99	0	0.99	KF600369.1	M1	2018-06-06	3		CO
M023 B	B	*NO SIMILARITY FOUND							M1	2018-06-06	2		CO
M038 B	B	Melissococcus plutonius DAT561 DNA, complete genome	1535	6137	0.98	0	0.99	AP018492.1	M1	2018-06-06	3		CO
M041 B	B	Enterococcus faecalis strain NW_A18 16S ribosomal RNA gene, partial sequence	1537	1537	0.99	0	0.99	MG543831.1	M1	2018-06-06	2		CO
M044 B	B	Enterococcus sp. RCB264 16S ribosomal RNA gene, partial sequence	1419	1419	0.97	0	0.97	KT260476.1	M1	2018-06-06	2		CO
M044 B	B	Melissococcus plutonius DAT561 DNA, complete genome	1511	6041	0.98	0	0.99	AP018492.1	M1	2018-06-06	2		CO
M051B	B	Melissococcus plutonius DAT561 DNA, complete genome	1299	5197	0.98	0	0.93	AP018492.1	M1	2018-06-06	2		CO
M053 B	B	Melissococcus plutonius DAT561 DNA, complete genome	1487	5945	0.99	0	0.98	AP018492.1	M1	2018-06-06	2	MELTED	CO
M056 B	B	Melissococcus plutonius DAT561 DNA, complete genome	1537	6144	0.98	0	0.99	AP018492.1	M1	2018-06-06	2	SCALE	CO
M069 B	B	Melissococcus plutonius DAT561 DNA, complete genome	1535	6137	0.98	0	0.99	AP018492.1	M1	2018-06-06	2		CO
M096 B	B	*NO SIMILARITY FOUND							M1	2018-06-06	2	MELTED	CO
M104 B	B	*NO SIMILARITY FOUND							M1	2018-06-06	2		CO
M111 B	B	*NO SIMILARITY FOUND							M1	2018-06-06	2	HEALTHY	CO
M112 B	B	Melissococcus plutonius DAT561 DNA, complete genome	1182	4726	0.75	0	0.99	AP018492.1	M1	2018-06-06	2	HEALTHY	CO
M115 B	B	Enterococcus faecalis strain NW_A18 16S ribosomal RNA gene, partial sequence	1541	1541	0.98	0	0.99	MG543831.1	M1	2018-06-06	2	MELTED	CO
M119 B	B	Enterococcus durans strain PON12 16S ribosomal RNA gene, partial sequence 1480 1480 99% 0.0 99% KF147885.1	1480	1480	0.99	0	0.99	KF147885.1	M1	2018-06-06	2	MELTED	CO
M121 B	B	Melissococcus plutonius DAT561 DNA, complete genome	1504	6011	0.98	0	0.99	AP018492.1	M1	2018-06-06	2		CO
K092 BL	BL	Enterococcus faecalis strain H25 chromosome, complete genome	1550	6196	0.99	0	0.99	CP029612.1	KSBHI	2018-06-06	1	HEALTHY	CO
K109 BL	BL	Enterococcus faecalis strain H25 chromosome, complete genome	1543	6166	0.98	0	0.99	CP029612.1	KSBHI	2018-06-06	2	MELTED	CO
K115 BL	BL	Enterococcus faecalis strain KY697084.1 16S ribosomal RNA gene, partial sequence	1522	1522	0.98	0	0.99	MH346267.1	KSBHI	2018-06-06	2	MELTED	CO
K096 BS	BS	Melissococcus plutonius DAT561 DNA, complete genome	1205	4815	0.8	0	0.98	AP018492.1	KSBHI	2018-06-06	2	MELTED	CO
K111 BS	BS	*NO SIMILARITY FOUND							KSBHI	2018-06-06	2	HEALTHY	CO
M007 BS	BS	Melissococcus plutonius DAT561 DNA, complete genome	1537	6144	0.98	0	0.99	AP018492.1	M1	2018-06-06	3?		CO
M014 BS	BS	Melissococcus plutonius DAT561 DNA, complete genome	1515	6055	0.98	0	0.99	AP018492.1	M1	2018-06-06	2		CO
3716 C	C	Melissococcus plutonius DAT561 DNA, complete genome	1541	6159	0.98	0	0.99	AP018492.1	KSBHI	2018-05-03			VT
3751 C	C	Melissococcus plutonius DAT561 DNA, complete genome	1541	6159	0.98	0	0.99	AP018492.1	M1	2018-05-03			IL
7038 C	C	Paenibacillus alvei strain Oa17A 16S ribosomal RNA gene, partial sequence	1535	1535	0.99	0	0.99	MG461561.1	KSBHI	2018-05-08			AL
K001 C	C	Lactobacillus kunkeei strain AFPSH8 16S ribosomal RNA gene, partial sequence	1537	1537	0.98	0	0.99	KU359946.1	KSBHI	2018-06-06	3	SCALE	CO
K002 C	C	Lactobacillus kunkeei strain G7_8_4MO2 16S ribosomal RNA gene, partial sequence	1543	1543	0.99	0	0.99	KF600369.1	KSBHI	2018-06-06	2		CO
K003 C	C	Lactobacillus kunkeei strain G7_8_4MO2 16S ribosomal RNA gene, partial sequence	1478	1478	0.99	0	0.98	KF600369.1	KSBHI	2018-06-06	2		CO
K019 C	C	Melissococcus plutonius DAT561 DNA, complete genome	1509	6033	0.99	0	0.99	AP018492.1	KSBHI	2018-06-06	3		CO
K021 C	C	Lactobacillus kunkeei strain 110UY 16S ribosomal RNA gene, partial sequence	1546	1546	0.99	0	0.99	KY496852.1	KSBHI	2018-06-06	3		CO
K023 C	C	Lactobacillus kunkeei strain 110UY 16S ribosomal RNA gene, partial sequence	1513	1513	0.99	0	0.99	KY496852.1	KSBHI	2018-06-06	2		CO
K038 C	C	Enterococcus lactis strain GA4 16S ribosomal RNA gene, partial sequence	1476	1476	0.99	0	0.98	FJ015055.1	KSBHI	2018-06-06	3		CO
K044 C	C	Enterococcus hirae strain RCB820 16S ribosomal RNA gene, partial sequence	1419	1419	0.98	0	0.97	KT261032.1	KSBHI	2018-06-06	2		CO
K061 C	C	Enterococcus faecalis strain NW_A18 16S ribosomal RNA gene, partial sequence	1543	1543	0.99	0	0.99	MG543831.1	KSBHI	2018-06-06	2		CO
K103 C	C	*NO SIMILARITY FOUND							KSBHI	2018-06-06	2		CO
K104 C	C	Enterococcus faecalis strain H25 chromosome, complete genome	1541	6159	0.98	0	1	CP029612.1	KSBHI	2018-06-06	2		CO
M001 C	C	Lactobacillus kunkeei strain G5_4_3MCO2 16S ribosomal RNA gene, partial sequence	1513	1513	0.98	0	0.99	KF600249.1	M1	2018-06-06	1		CO
M002 C	C	Lactobacillus kunkeei strain 110UY 16S ribosomal RNA gene, partial sequence	1519	1519	0.99	0	0.99	KY496852.1	M1	2018-06-06	2		CO
M005 C	C	Parasaccharibacter apium strain G7_7_3c, complete genome	1539	1623	0.98	0	0.99	CP020554.1	M1	2018-06-06	2		CO
M013 C	C	Lactobacillus kunkeei strain H19_5_2MCO2 16S ribosomal RNA gene, partial sequence	1208	1208	0.82	0	0.97	KF599406.1	M1	2018-06-06	PP		CO
M015 C	C	Melissococcus plutonius DAT561 DNA, complete genome	1530	6115	0.98	0	0.99	AP018492.1	M1	2018-06-06	2		CO
M016 C	C	Melissococcus plutonius DAT561 DNA, complete genome	1539	6151	0.98	0	0.99	AP018492.1	M1	2018-06-06	2		CO
M017 C	C	Lactobacillus sp. AcjLac9 gene for 16S ribosomal RNA, partial sequence	1555	1555	0.99	0	0.99	AB810030.1	M1	2018-06-06	3		CO
M019 C	C	Lactobacillus kunkeei strain B11-1 16S ribosomal RNA gene, partial sequence	845	845	0.97	0	0.84	JQ009352.1	M1	2018-06-06	3		CO
M020 C	C	Melissococcus plutonius DAT561 DNA, complete genome	1478	5908	0.98	0	0.99	AP018492.1	M1	2018-06-06	2		CO
M022 C	C	Melissococcus plutonius DAT561 DNA, complete genome	1531	6122	0.99	0	0.99	AP018492.1	M1	2018-06-06	2		CO
M024 C	C	Melissococcus plutonius DAT561 DNA, complete genome	1507	6026	0.99	0	0.99	AP018492.1	M1	2018-06-06	2		CO
M038 C	C	Enterococcus hirae strain KSBU5Da 16S ribosomal RNA gene, partial sequence	1434	1434	0.99	0	0.97	MF977717.1	M1	2018-06-06	3		CO
M055 C	C	Melissococcus plutonius DAT561 DNA, complete genome	1513	6048	0.99	0	0.99	AP018492.1	M1	2018-06-06	2		CO
M058 C	C	Enterococcus hirae gene for 16S ribosomal RNA, partial sequence, strain: ZZU A1	1472	1472	0.99	0	0.98	LC119115.1	M1	2018-06-06	2		CO
M071 C	C	Melissococcus plutonius DAT561 DNA, complete genome	1448	5790	0.99	0	0.98	AP018492.1	M1	2018-06-06	2		CO
M092 C	C	Enterococcus faecalis strain CS13+ 16S ribosomal RNA gene, partial sequence	1448	1448	0.99	0	0.98	KM016956.1	M1	2018-06-06	1	HEALTHY	CO
M100 C	C	Pseudohongiella spirulinae strain KCTC 32221, complete genome	52.8	105	0.03	0.018	1	CP013189.1	M1	2018-06-06	3	SCALE	CO
M103 C	C	Lactobacillus kunkeei strain H14_6_1BCO2 16S ribosomal RNA gene, partial sequence	979	979	0.77	0	0.93	KF599428.1	M1	2018-06-06	2		CO
M104 C	C	Enterococcus faecalis strain H25 chromosome, complete genome	1543	6166	0.99	0	0.99	CP029612.1	M1	2018-06-06	2		CO
M121 C	C	Lactobacillus kunkeei strain 110UY 16S ribosomal RNA gene, partial sequence	1483	1483	0.99	0	0.98	KY496852.1	M1	2018-06-06	2		CO
K088 CL	CL	Enterococcus faecalis strain 5 16S ribosomal RNA gene, partial sequence	1555	1555	0.99	0	0.99	MH362705.1	KSBHI	2018-06-06	PUPA PURPLE	UNCAPPED	CO
K091 CL	CL	Enterococcus faecalis strain H25 chromosome, complete genome	1524	6092	0.99	0	0.99	CP029612.1	KSBHI	2018-06-06	2		CO
K117 CL	CL	Enterococcus faecalis strain 5 16S ribosomal RNA gene, partial sequence	1555	1555	0.99	0	0.99	MH362705.1	KSBHI	2018-06-06	1	HEALTHY	CO
M058 CL	CL	Enterococcus hirae strain 1-W-9 16S ribosomal RNA gene, partial sequence	1454	1454	0.99	0	0.97	MF326296.1	M1	2018-06-06	2		CO
M088 CL	CL	Enterococcus faecalis strain 5 16S ribosomal RNA gene, partial sequence	1555	1555	0.99	0	0.99	MH362705.1	M1	2018-06-06	PUPA PURPLE	UNCAPPED	CO
M091 CL	CL	Enterococcus faecalis strain H50 16S ribosomal RNA gene, partial sequence	1548	1548	0.99	0	0.99	KJ626240.1	M1	2018-06-06	2		CO
M109 CL	CL	Enterococcus faecalis gene for 16S ribosomal RNA, partial sequence, strain: APUIK-20	1546	1546	0.98	0	0.99	AB898316.1	M1	2018-06-06	2	MELTED	CO
M116 CL	CL	Lactobacillus kunkeei strain G5_7_3MO2 16S ribosomal RNA gene, partial sequence	1474	1474	0.98	0	0.98	KF600275.1	M1	2018-06-06	2		CO
3716 D	D	Paenibacillus alvei strain Oa17A 16S ribosomal RNA gene, partial sequence	1528	1528	0.99	0	0.99	MG461561.1	M1	2018-05-03			VT
Morphology Code
A	swirl like appendages off edge of colonies
B	smooth edge, white circle
C	jagged edged, circle shape,
D	finger like appendages off of colonies
L	large
S	small
